# Supplementary material for: Hyperbranched glycoconjugated polymer from natural small molecule kanamycin as a safe and efficient gene vector
Source: Royal Society of Chemistry journal article supplement (doi:10.1039/c1py00333j), 2011-01-01
Supplement: c1py00333j.pdf [file c1py00333j.pdf]

**Supplementary Data for:**

# Hyperbranched glycoconjugated polymer from natural small molecule kanamycin as a safe and efficient gene vector

Mingsheng Chen,<sup>†,§,II</sup> Jieli Wu,<sup>‡</sup> Linzhu Zhou,<sup>†</sup> Chengyu Jin,<sup>‡</sup> Chunlai Tu,<sup>†</sup>

Bangshang Zhu,<sup>‡</sup> Fuan Wu,<sup>§,II</sup> Qi Zhu,<sup>†</sup> Xinyuan Zhu,<sup>†,‡,\*</sup> Deyue Yan<sup>†,\*</sup>

*School of Chemistry and Chemical Engineering, State Key Laboratory of Metal*

*Matrix Composites, Shanghai Jiao Tong University, 800 Dongchuan Road, Shanghai*

*200240, P. R. China, Instrumental Analysis Center, Shanghai Jiao Tong University,*

*800 Dongchuan Road, Shanghai 200240, P. R. China, The Sericultural Research*

*Institute, Chinese Academy of Agricultural Sciences, Zhenjiang 212018, P. R. China,*

*Jiangsu University of Science and Technology, Zhenjiang, 212003, P. R. China*

\* Corresponding authors. E-mail: xyzhu@sjtu.edu.cn (X.Z.); dyyan@sjtu.edu.cn

(D.Y.). Tel: 86-21-34205699. Fax: 86-21-34205722.

<sup>†</sup> School of Chemistry and Chemical Engineering, Shanghai Jiao Tong University.

<sup>‡</sup> Instrumental Analysis Center, Shanghai Jiao Tong University.

<sup>§</sup> The Sericultural Research Institute, Chinese Academy of Agricultural Sciences.

<sup>II</sup> Jiangsu University of Science and Technology.

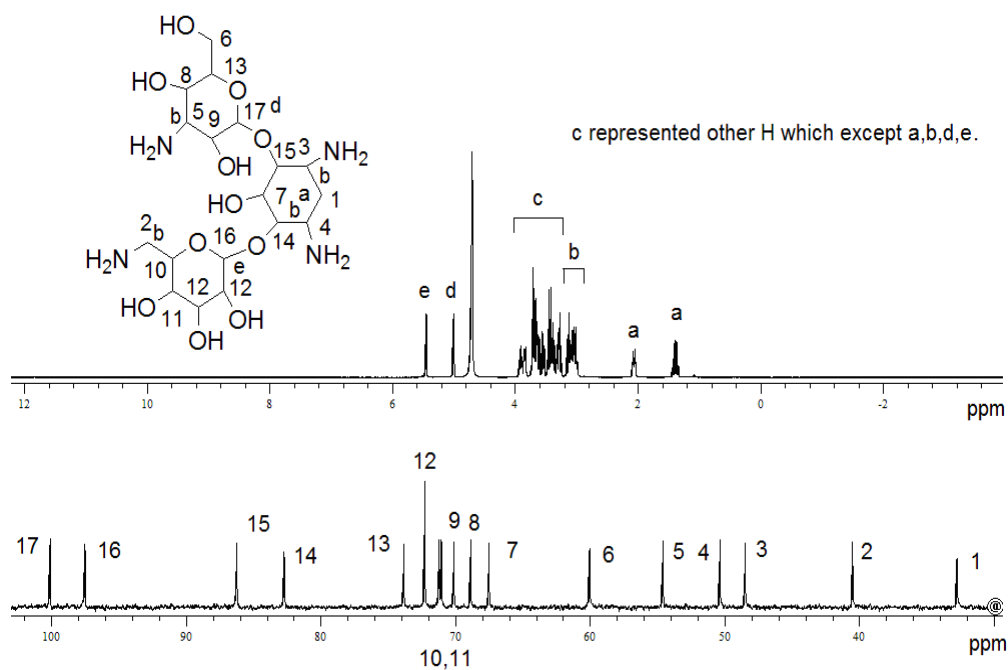

**Figure S1.**  $^1\text{H}$  NMR and  $^{13}\text{C}$  NMR spectra of kanamycin sulphate.

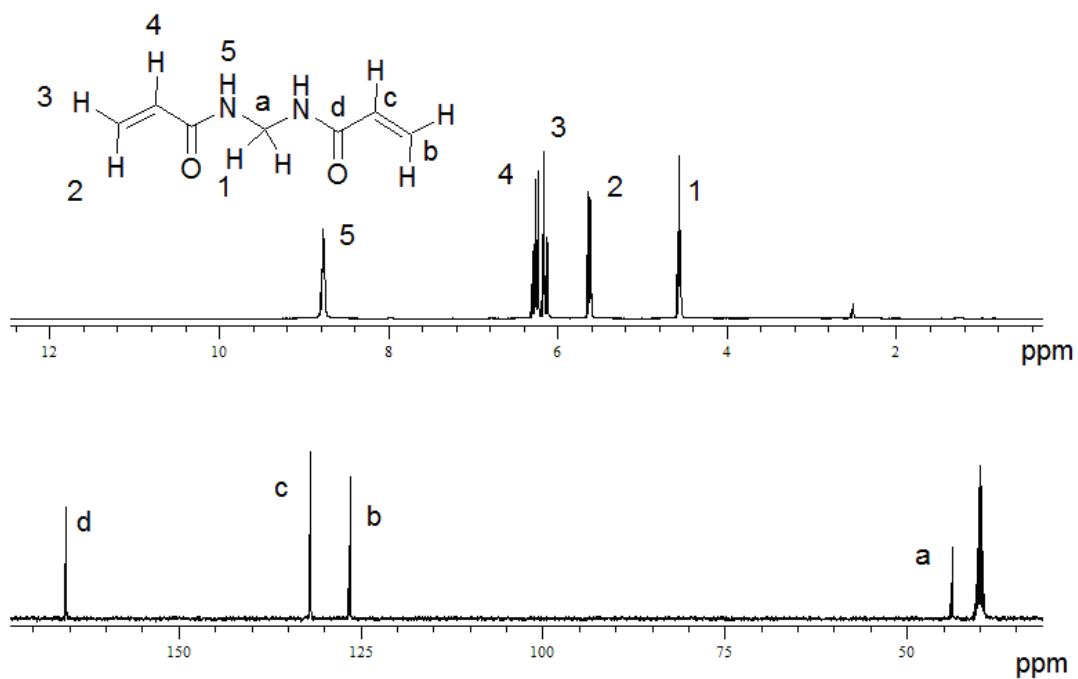

**Figure S2.**  $^1\text{H}$  NMR and  $^{13}\text{C}$  NMR spectra of MBA.

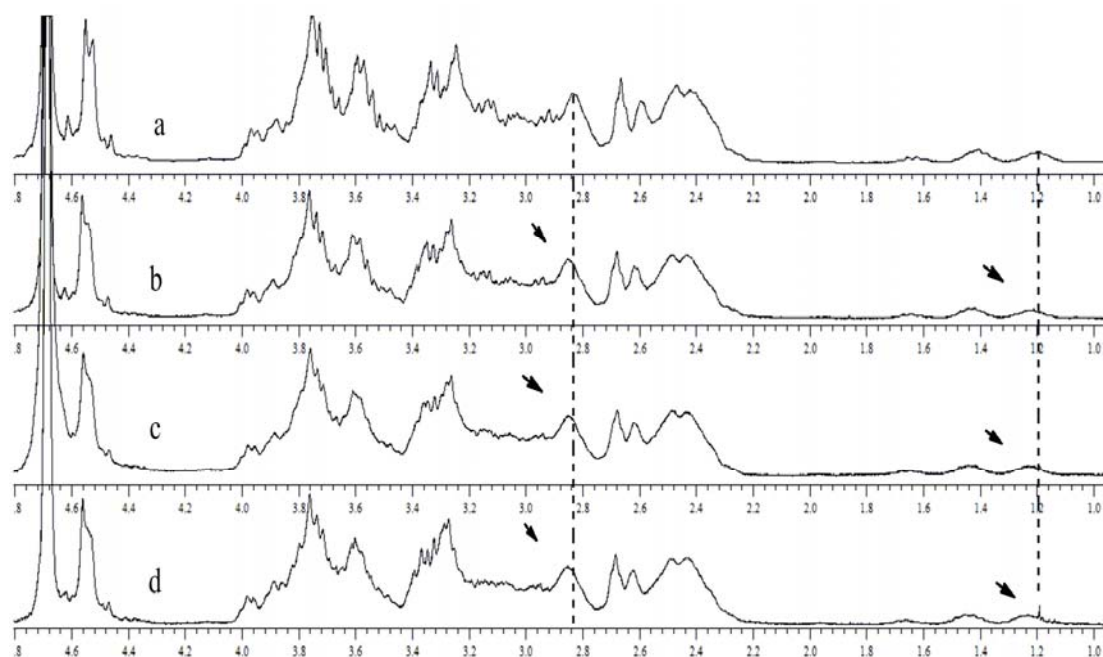

**Figure S3.**  $^1\text{H}$  NMR spectra of HPKM in  $\text{D}_2\text{O}$  at different degradation time cultured at  $37^\circ\text{C}$  under acidic conditions (pH 7.4): (a) 0 day; (b) 5 days; (c) 9 days, (d) 17 days.

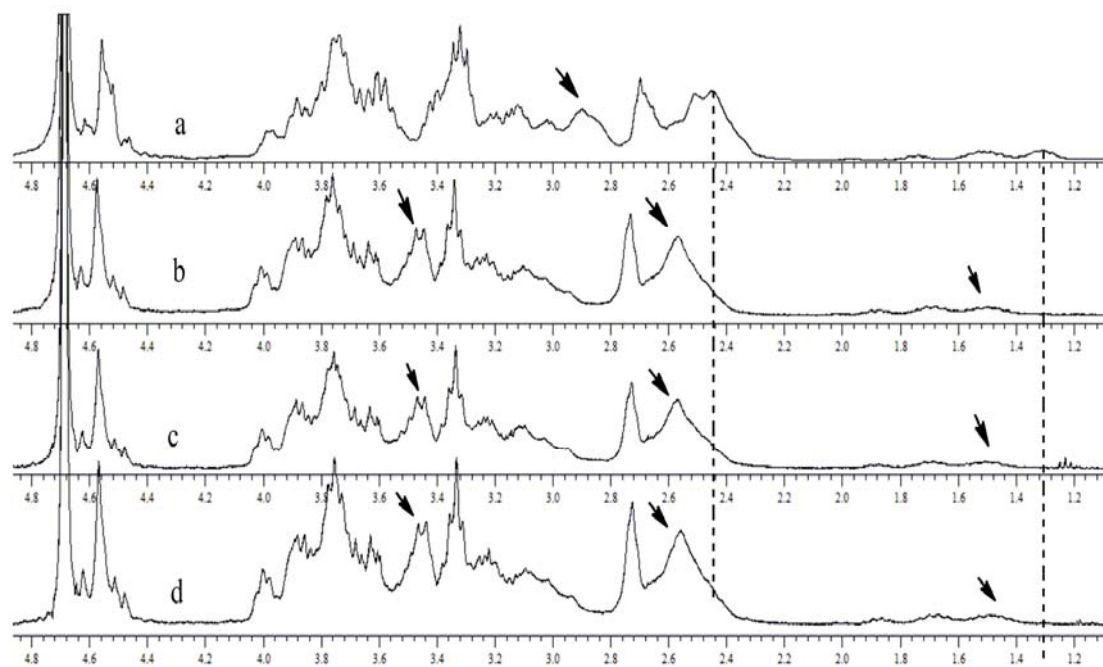

**Figure S4.**  $^1\text{H}$  NMR spectra of HPKM in  $\text{D}_2\text{O}$  at different degradation time cultured at  $37^\circ\text{C}$  under acidic conditions (pH 2.5): (a) 0 day; (b) 5 days; (c) 9 days, (d) 17 days.
